# Supplementary material for: Integration of time-series meta-omics data reveals how microbial ecosystems respond to disturbance
Source: PubMed Central journal article supplement (PMC7572474; doi:10.1038/s41467-020-19006-2), 2020-10-19
Supplement: 41467_2020_19006_MOESM1_ESM.pdf [file 41467_2020_19006_MOESM1_ESM.pdf]

# Supplementary Information

## Integration of time-series meta-omics data reveals how microbial ecosystems respond to disturbance

Herold et al.

### Table of Contents

|                                                                                                       |    |
|-------------------------------------------------------------------------------------------------------|----|
| Supplementary Figures.....                                                                            | 2  |
| <i>Supplementary Note 1: Expression of key functions involved in lipid metabolism over time</i> ..... | 18 |
| <i>Supplementary References</i> .....                                                                 | 20 |

# Supplementary Figures

**a**

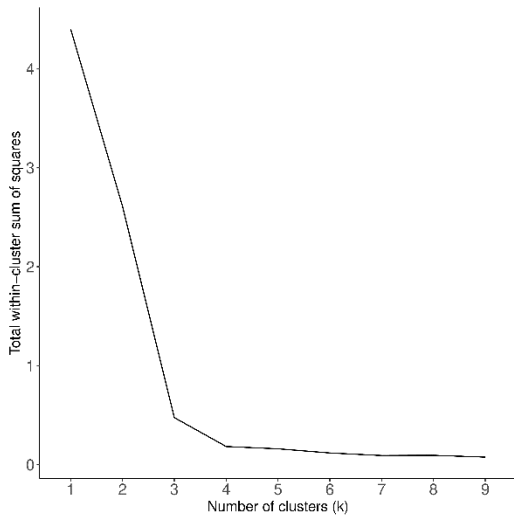

**b**

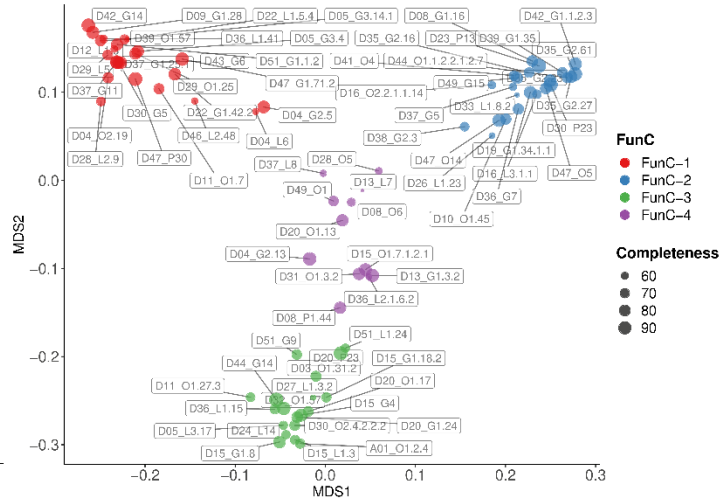

**Supplementary Figure 1: Clustering of functional potential. (a)** Total within-cluster sum of squares shown for different values of  $k$  in the  $k$ -means clustering of KEGG ortholog presence/absence profiles of the rMAGs. **(b)** Assignment of clusters according to  $k$ -means clustering with  $k=4$  with colour indicating the assigned cluster. Labels indicate rMAG-identifier and point size reflects MAG completeness as estimated with CheckM.

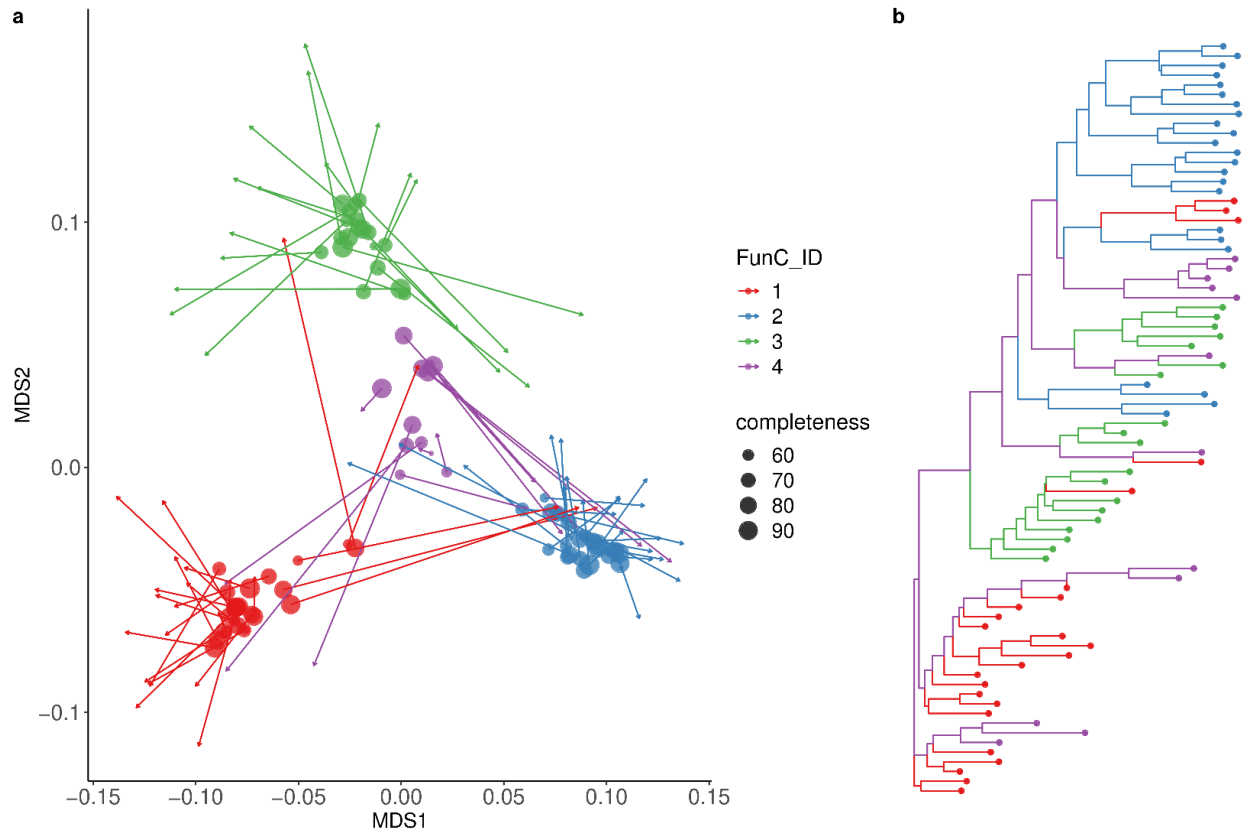

**Supplementary Figure 2:** Procrustes analysis comparing an embedding of rMAG distances of their KO profiles (see Fig 2a, Supplementary Fig 1b) to an embedding based on genomic distances computed using mash (**a**). Point size indicates rMAG completeness and colour the FunC assignment of an rMAG. Arrows indicate the position of the embedded points in the multi-dimension scaling of genomic distances after rotation and scaling. (**b**) Genomic distances were inferred with mash and are visualised as a neighbour joining based tree.

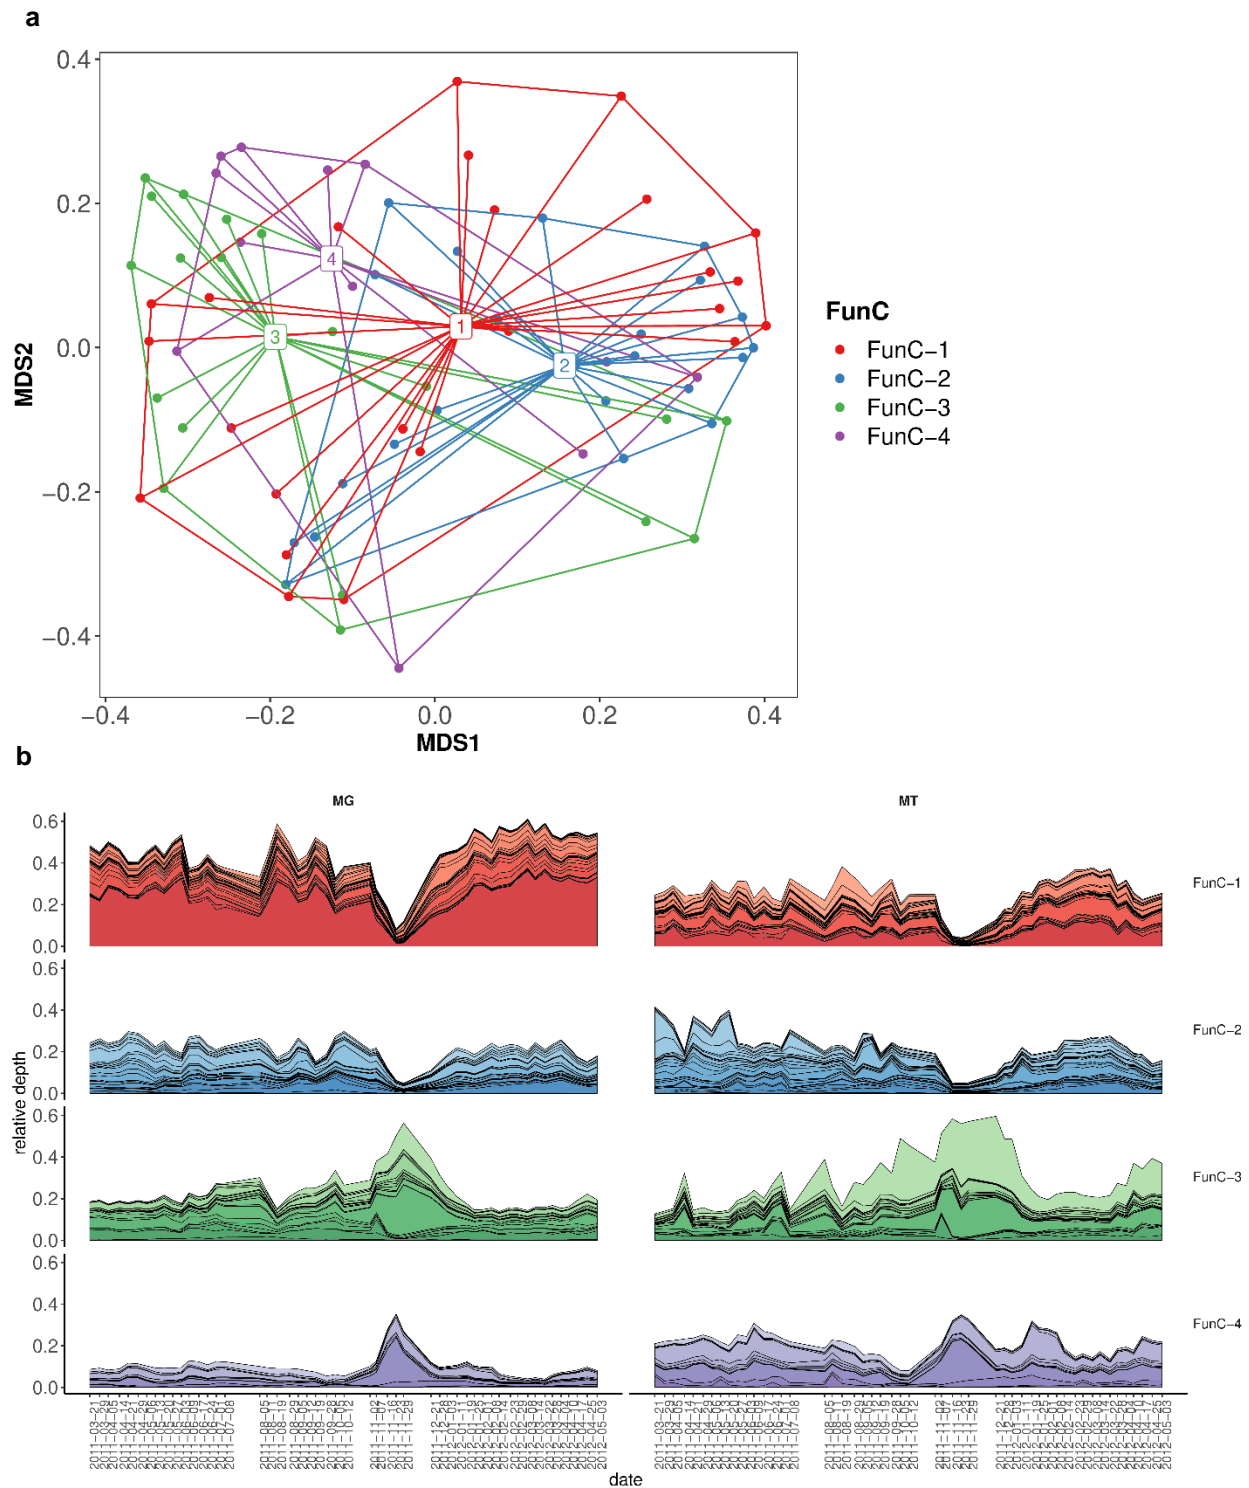

**Supplementary Figure 3: FunC dynamics.** (a) Spider-plot of ordination of distances based on intra-rMAG abundance correlations. Individual rMAGs marked by FunC assignment (color). FunC-centroids are shown and lines connect the rMAGs to their respective FunC-centroid. (b) Relative abundance (MG depth) and activity (MT depth) of rMAGs over-time. Selected rMAGs are shown ( $n=78$ ; see also main text). Color-palettes and separated panels indicate FunC assignment, red: FunC1, blue: FunC2, green: FunC3, purple: FunC-4

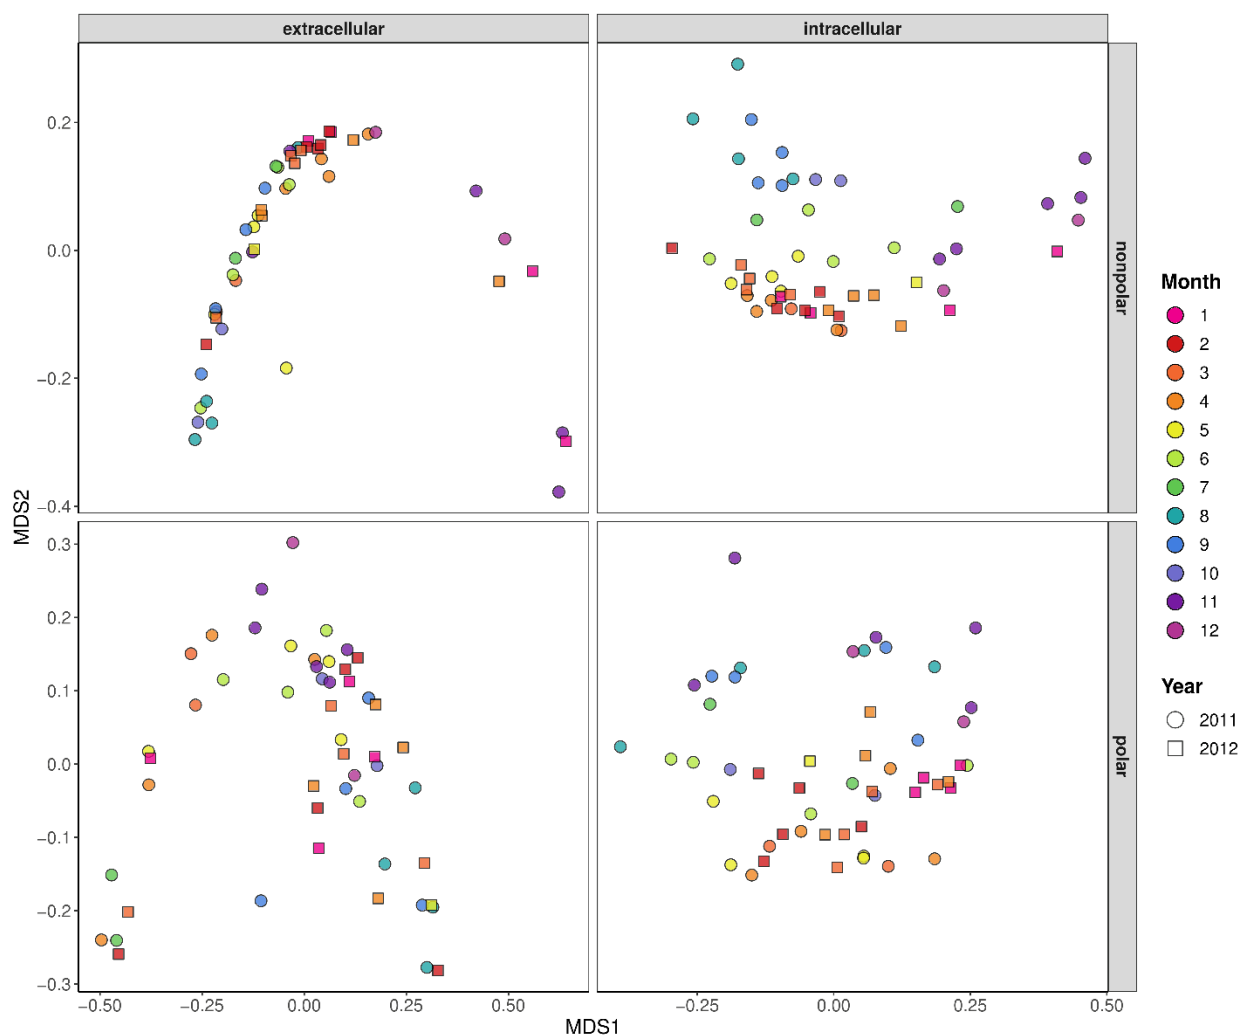

**Supplementary Figure 4:** Ordination of Bray-Curtis dissimilarity of metabolite intensities. Ordinations for four distinct measurements are shown: nonpolar extracellular (upper left), nonpolar intracellular (upper right), polar extracellular (lower left), polar intracellular (lower right). Colors indicate the month of the sampling date and point-shapes reflect the year. n=51 time-points.

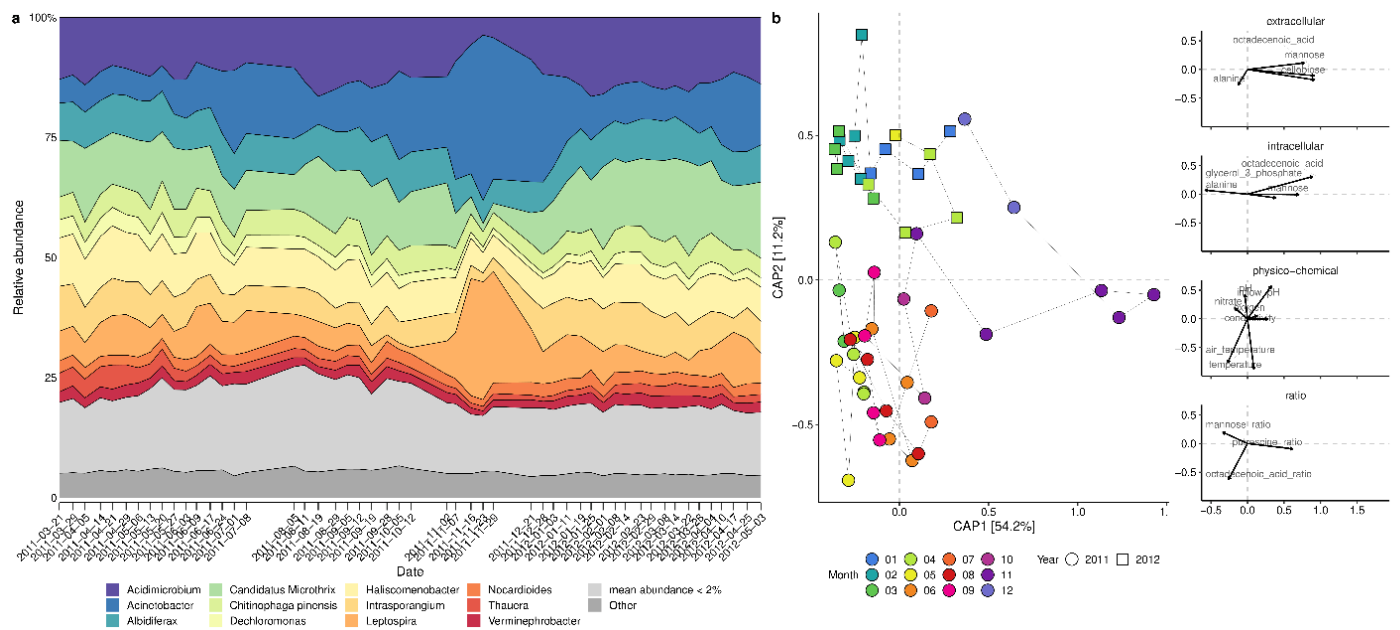

**Supplementary Figure 5: (a)** Relative levels of MP spectral counts for recovered populations (rMAGs). The relative counts of individual rMAGs are grouped based on genus-level taxonomic assignment with rMAGs of unresolved taxonomy grouped in “Other”. Recoverd genera with mean relative counts below 2% are summarized as a single group (light grey). n=78 rMAGs. **(b)** Ordination of Bray-Curtis dissimilarity of the relative counts of individual rMAGs constrained by selected abiotic factors (levels of metabolites, metabolite-ratios, and physico-chemical parameters fit as vectors; black arrows and labelled arrowheads; with arrow length indicating environmental scores as predictors for each factor). Points are coloured by month of sampling and point-shape reflects the year of sampling. Thin black lines visualize the time course of sampling. n=51 time-points.

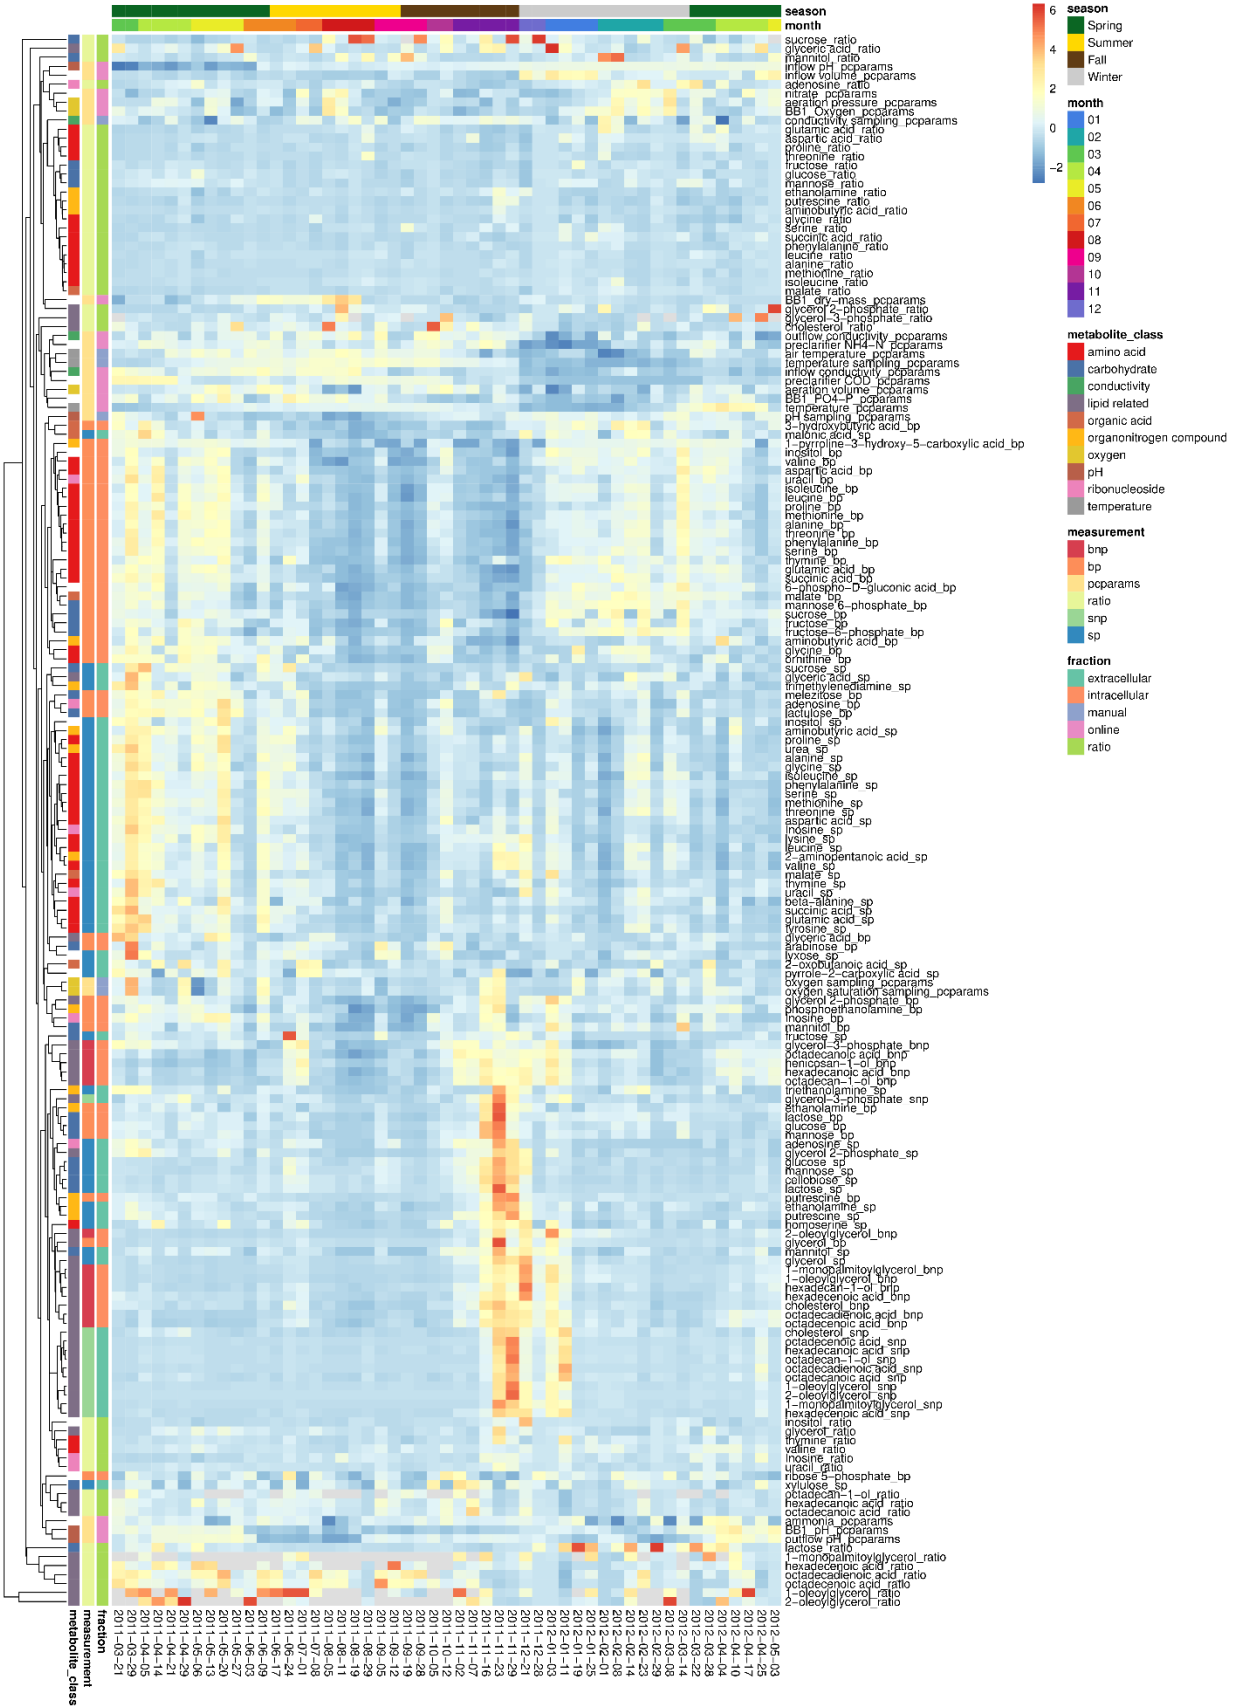

**Supplementary Figure 6:** Heatmap of z-score transformed intensities of metabolites, metabolite-ratios (intra-vs.-extracellular) and measurements of physico-chemical parameters. Row annotations show the broad type of the metabolite or measurement (metabolite\_class), while “measurement” and “fraction” distinguish the individual measurements. Column annotations show the season and month of the sampling dates (n=51 time-points).

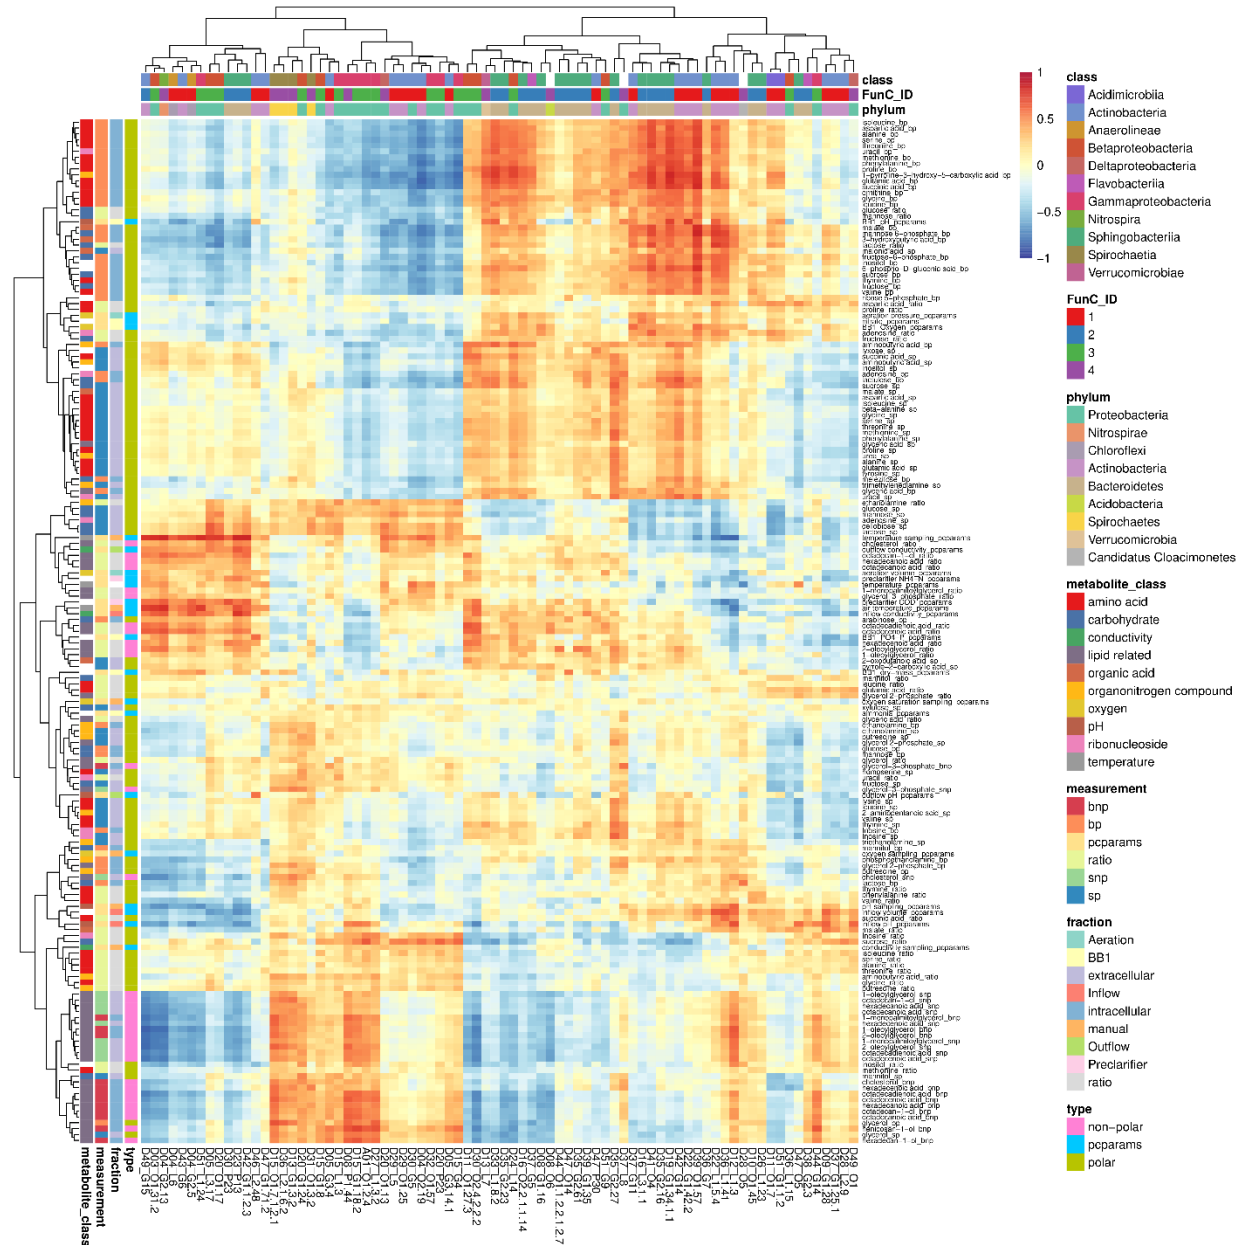

**Supplementary Figure 7:** Heatmap of pairwise Spearman rank correlations of metabolite or physico-chemical parameter measurements to rMAG relative abundances (n=78 rMAGs). Metabolite values are z-score normalised. Row annotations show information on metabolite measurements while column annotations show rMAG taxonomy or FunC assignment.



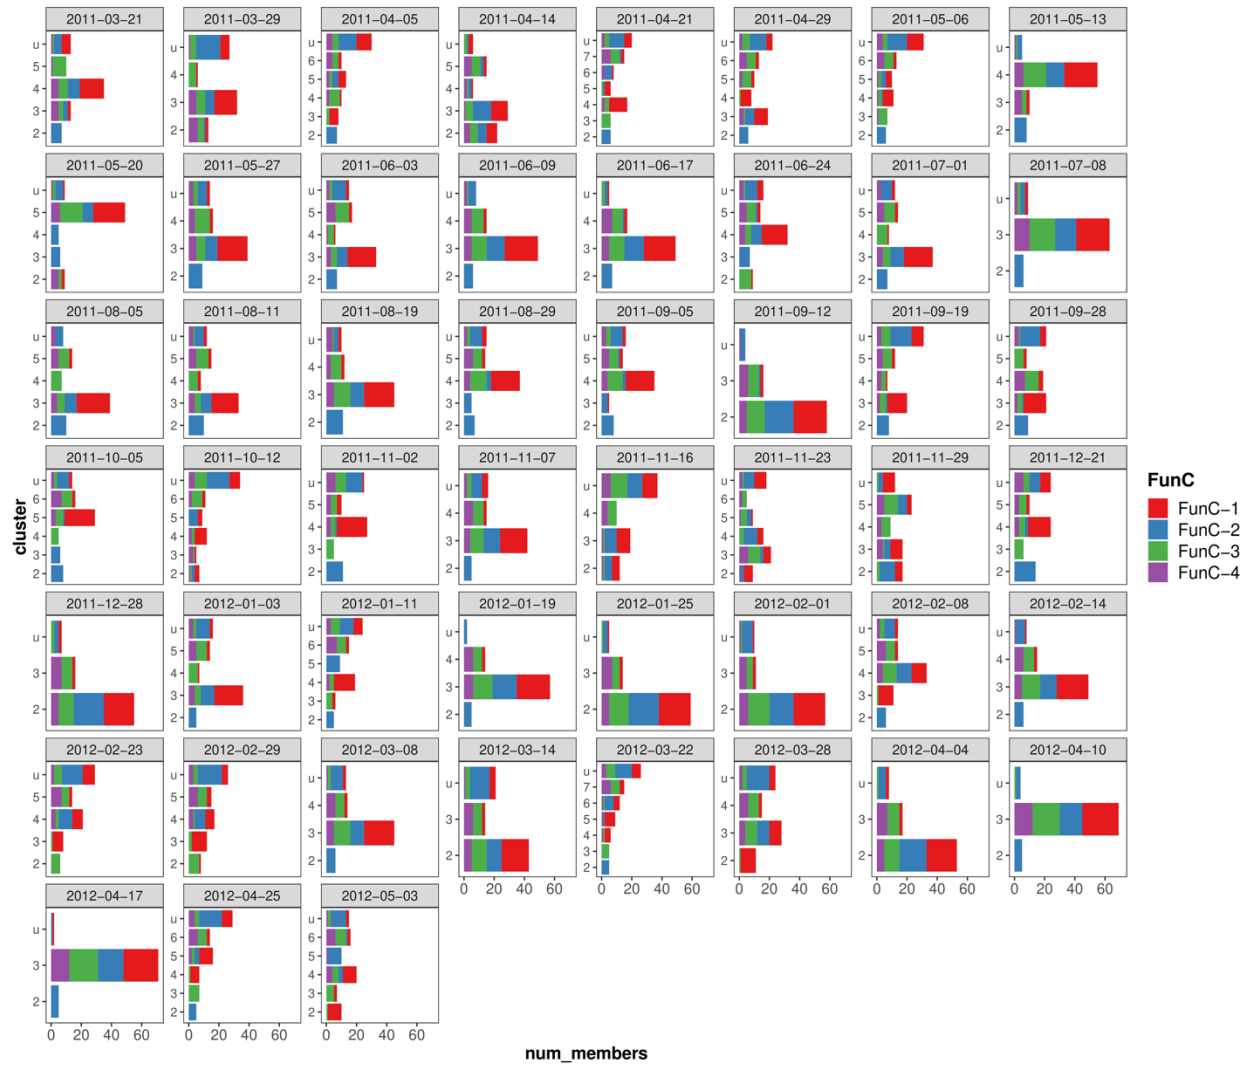

**Supplementary Figure 8:**

Number of rMAGs (of  $n=78$  rMAGs) assigned to clusters according to expression profiles for every *in situ* time-point. The identifiers of clusters are shown (y-axis) with "u" marking the group of unassigned rMAGs. Colored bars indicate the numbers of rMAGs according to their FunC assignment.

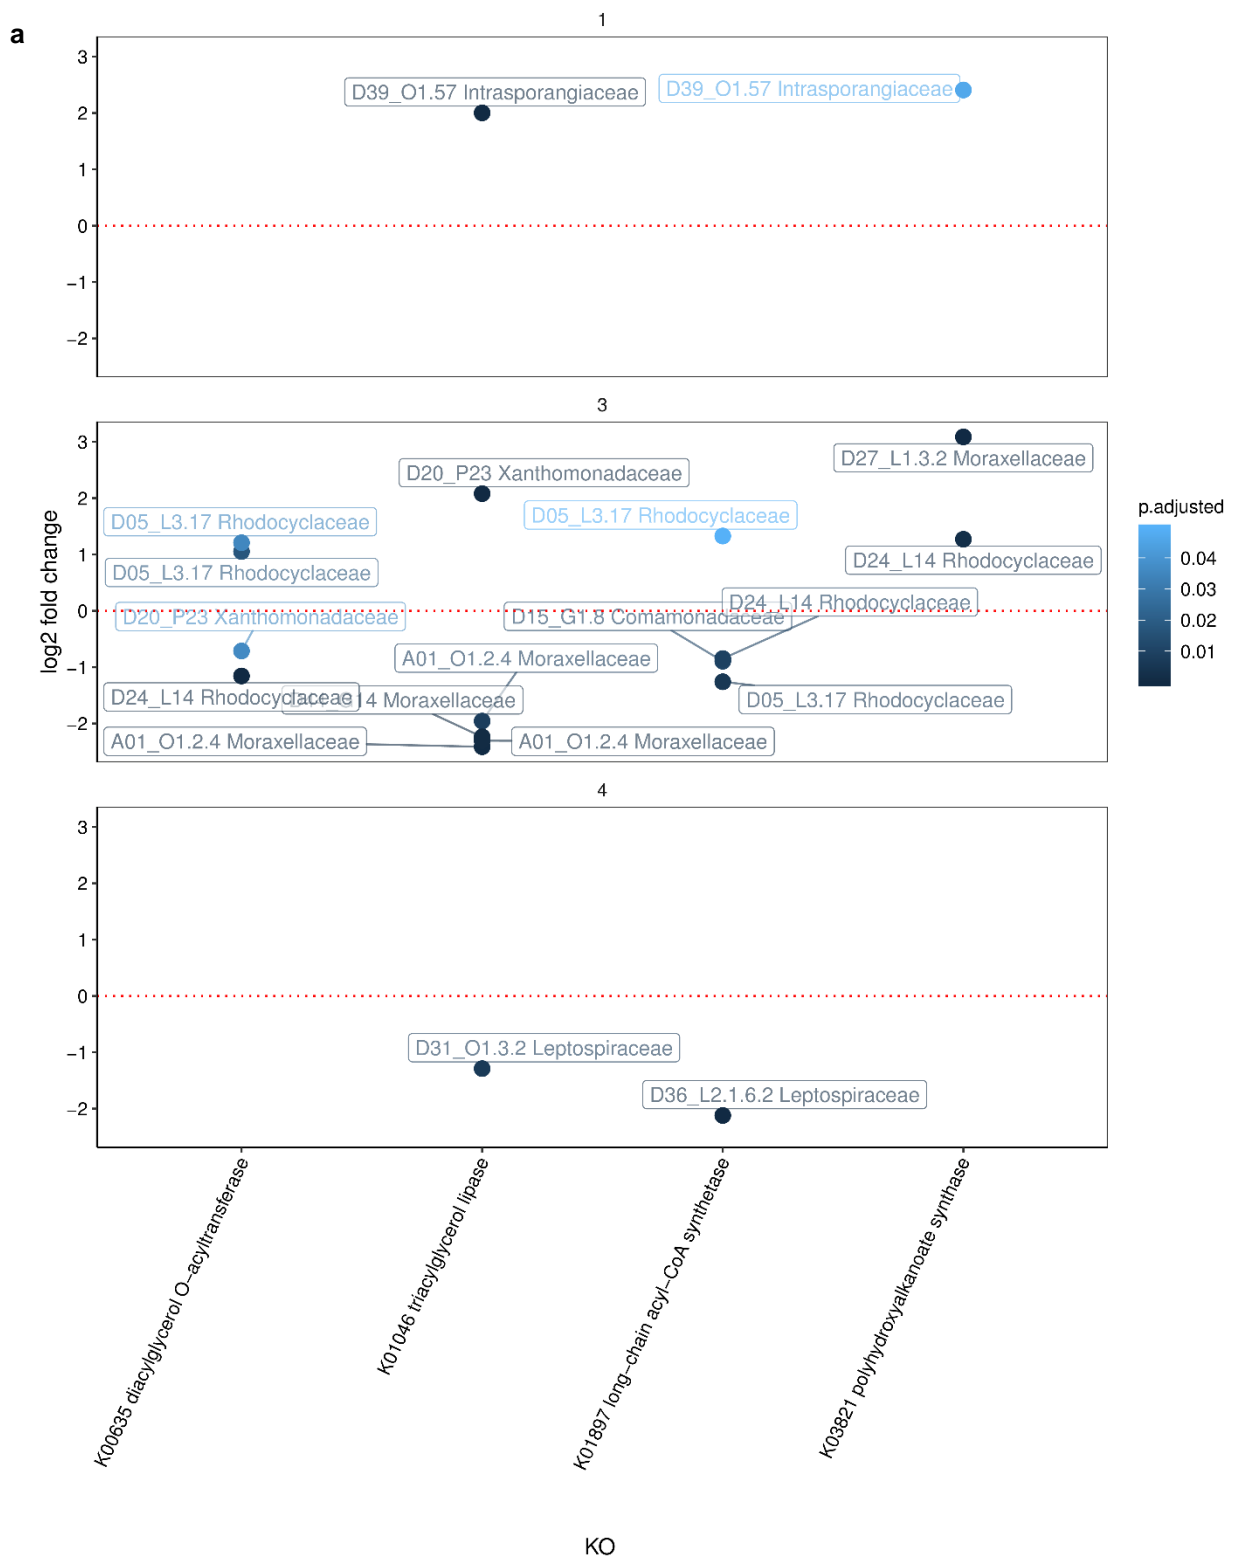

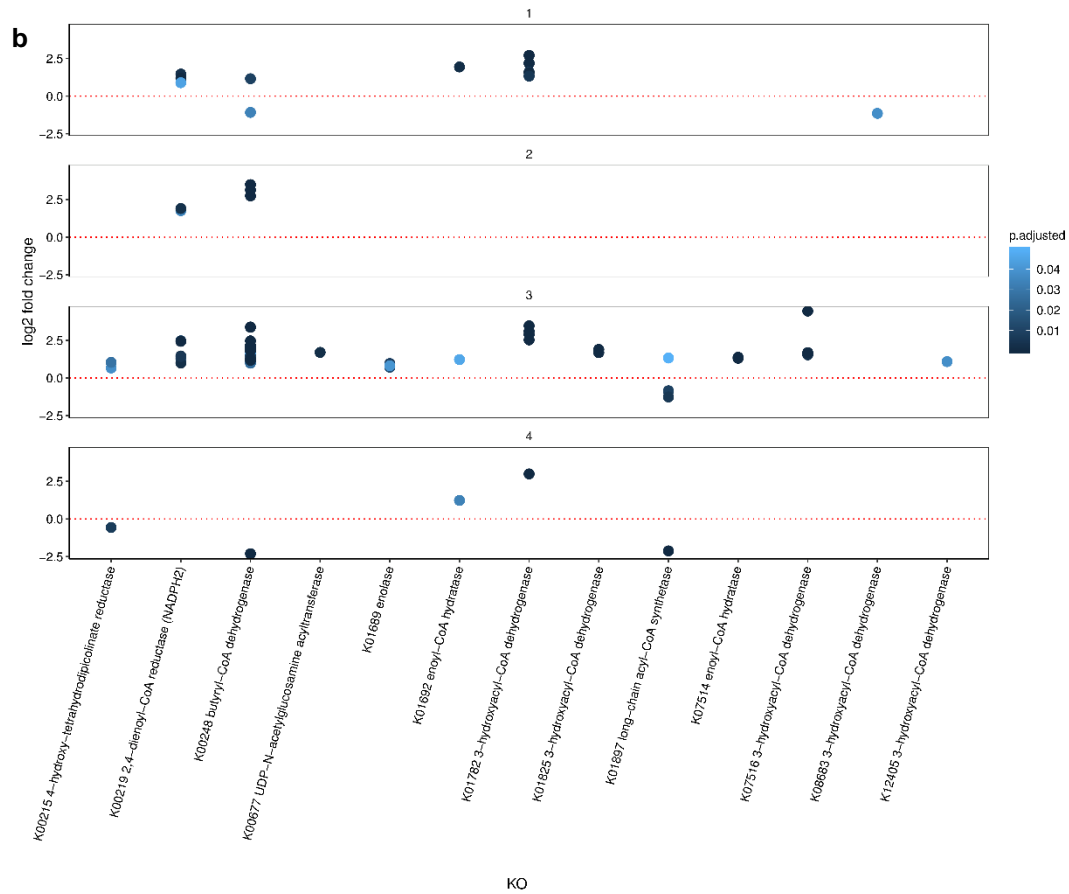

**Supplementary Figure 9:** Differentially expressed genes (DEGs) in the ex situ experiments comparing 0 h and 5 h time-points. Labels indicate rMAG-identifier and family assignment. The color gradient indicates the adjusted p-value (two-sided Wald test, multiple testing correction with Benjamini & Hochberg method in DESeq2). Individual panels show individual FunCs (1 to 4). Highlighted DEGs were selected for KOs with functions involved in lipid accumulation (**a**) and functions involved in beta-oxidation (**b**).

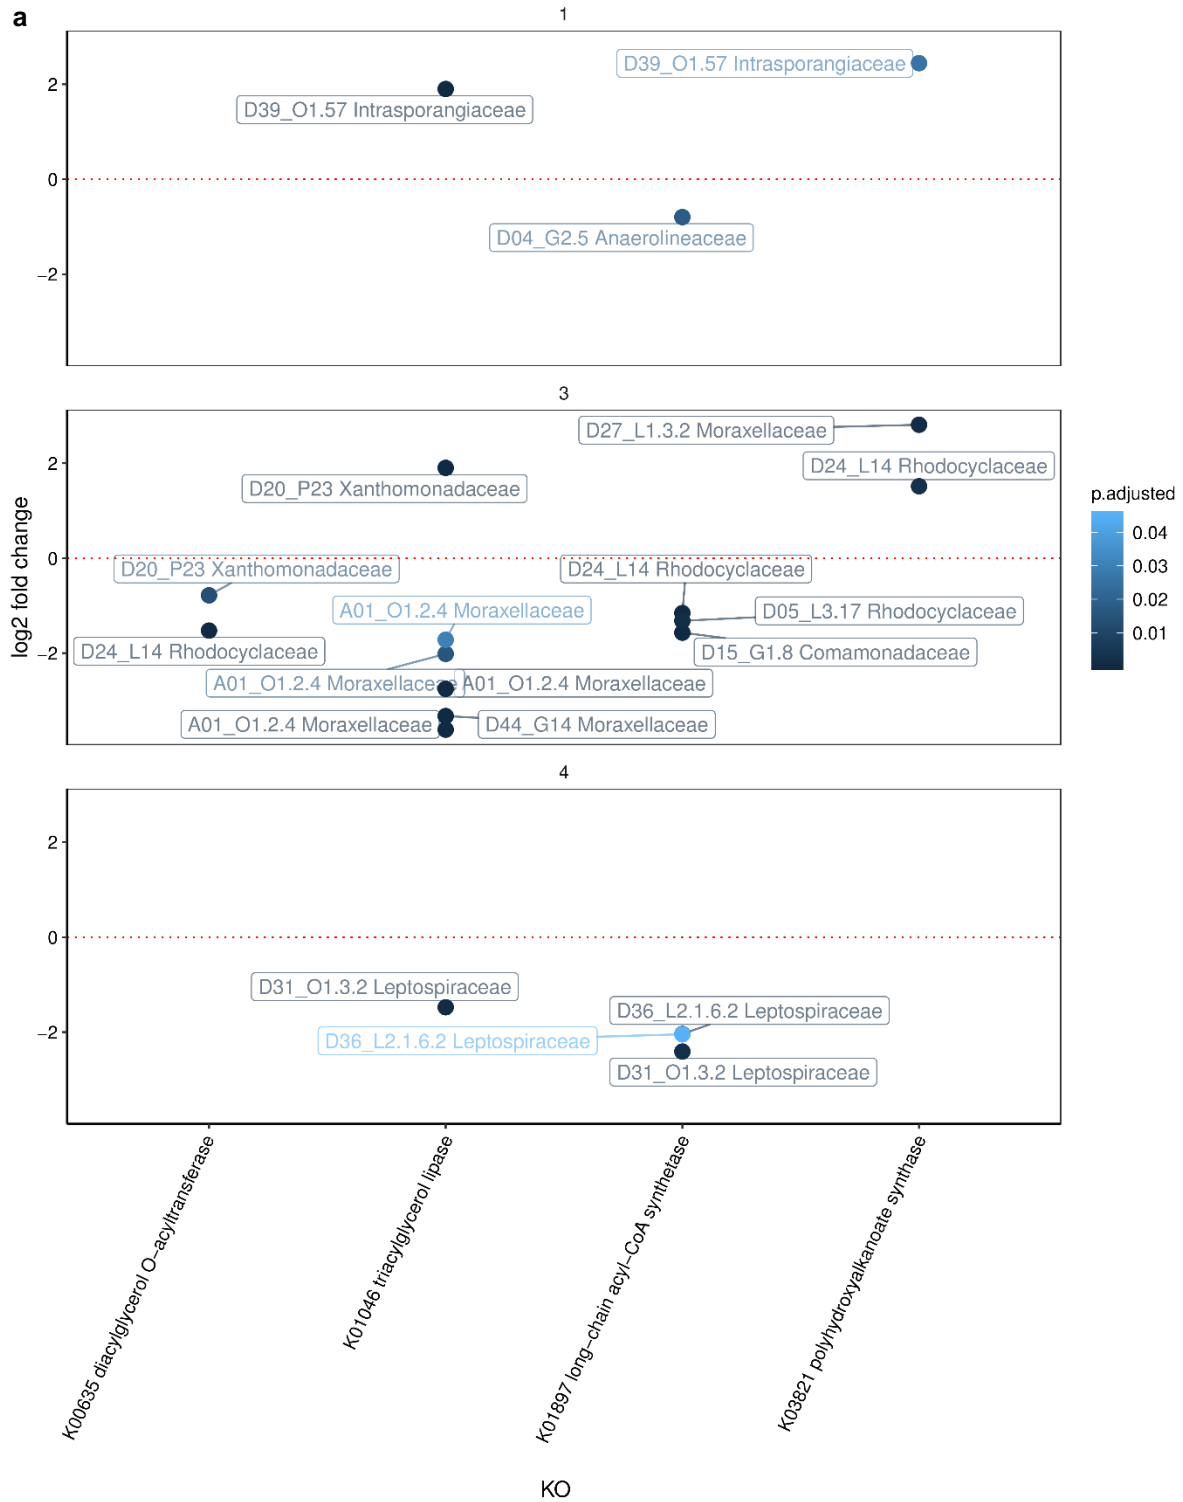

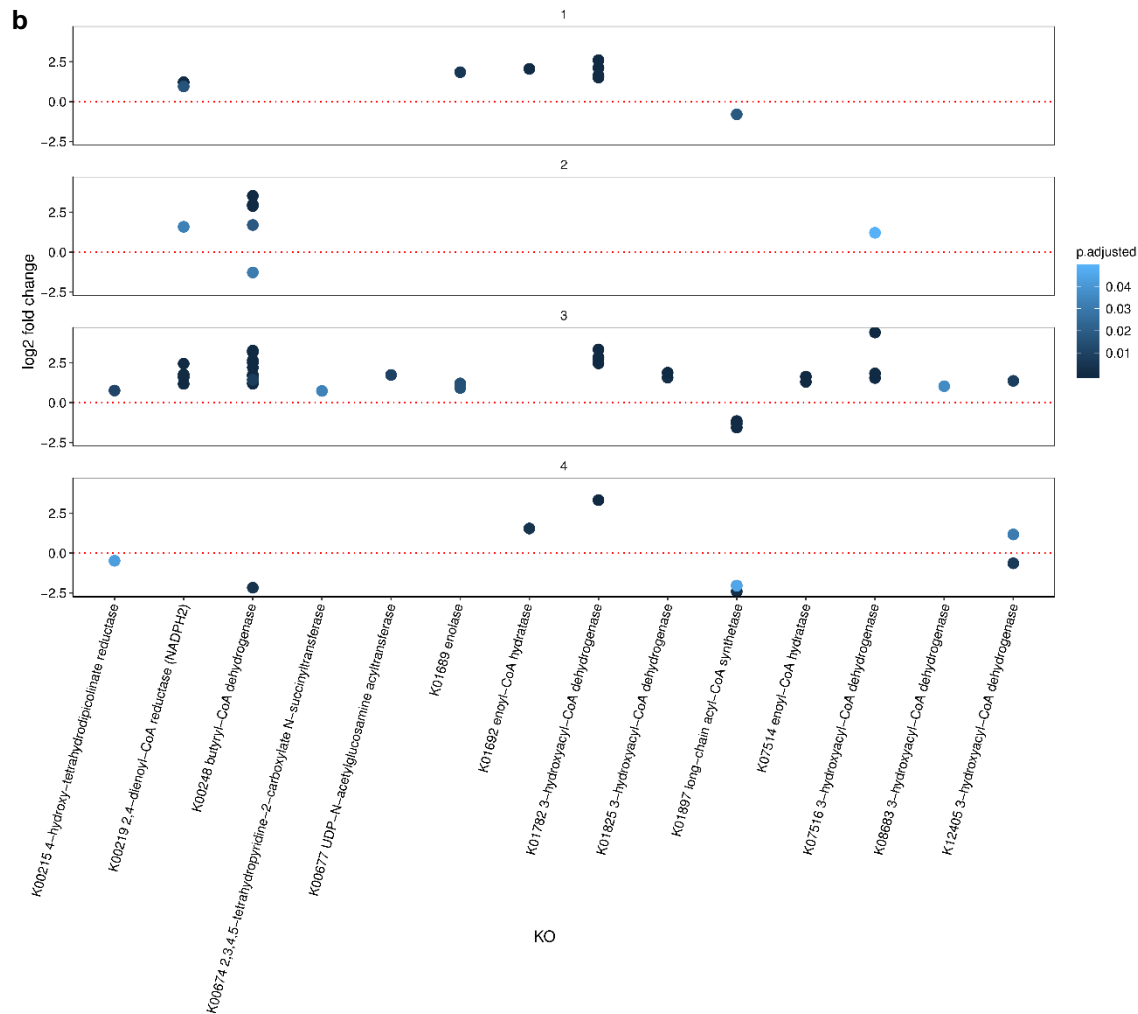

**Supplementary Figure 10:** Differentially expressed genes (DEG) in the ex-situ experiments 0 h and 8 h time-points. Labels indicate rMAG-identifier and family assignment. The color gradient indicates the adjusted p-value (two-sided Wald test, multiple testing correction with Benjamini & Hochberg method in DESeq2). Individual panels show individual FunCs (1 to 4). Highlighted DEGs were selected for KOs with (a) functions involved in lipid accumulation and (b) functions involved in beta-oxidation.

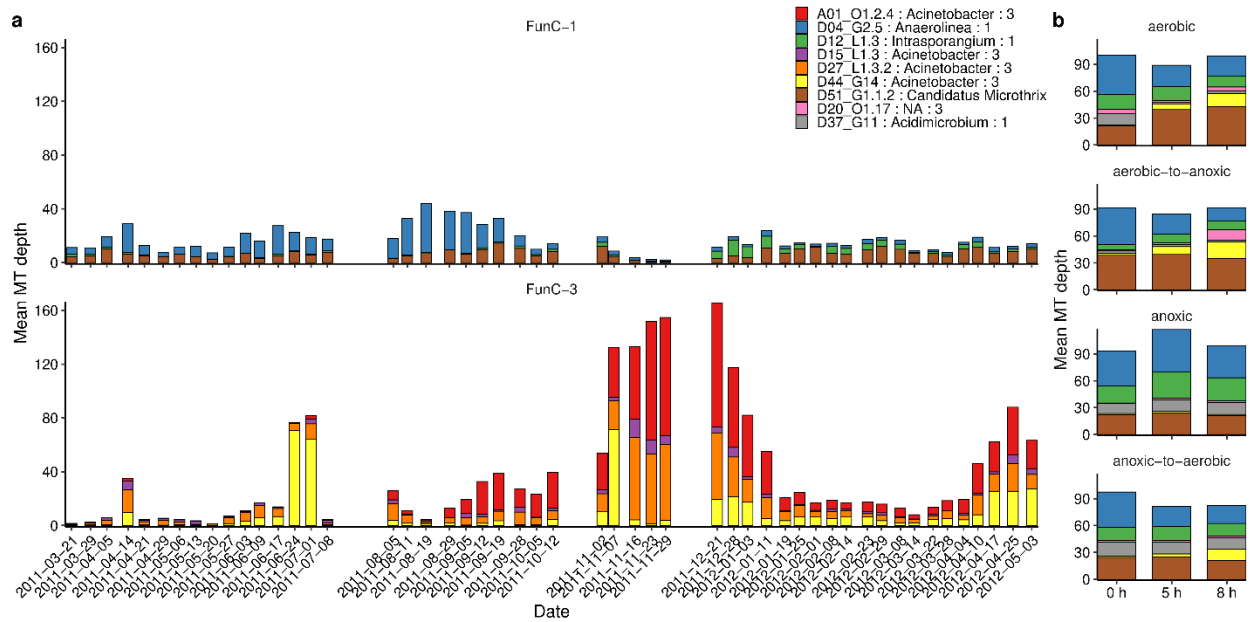

**Supplementary Figure 11:** Wax-ester synthase/diacylglycerol acyltransferase (WS/DGAT) gene expression levels over time. Only rMAGs with a mean MT-depth of at least 10 in any time-point for genes annotated with KO: K00635 are shown (n=9 rMAGs). In situ (a) and ex situ (b) experiments. Colors indicate rMAG assignment in the format: “rMAG ID : Genus level assignment: FunC-ID”.

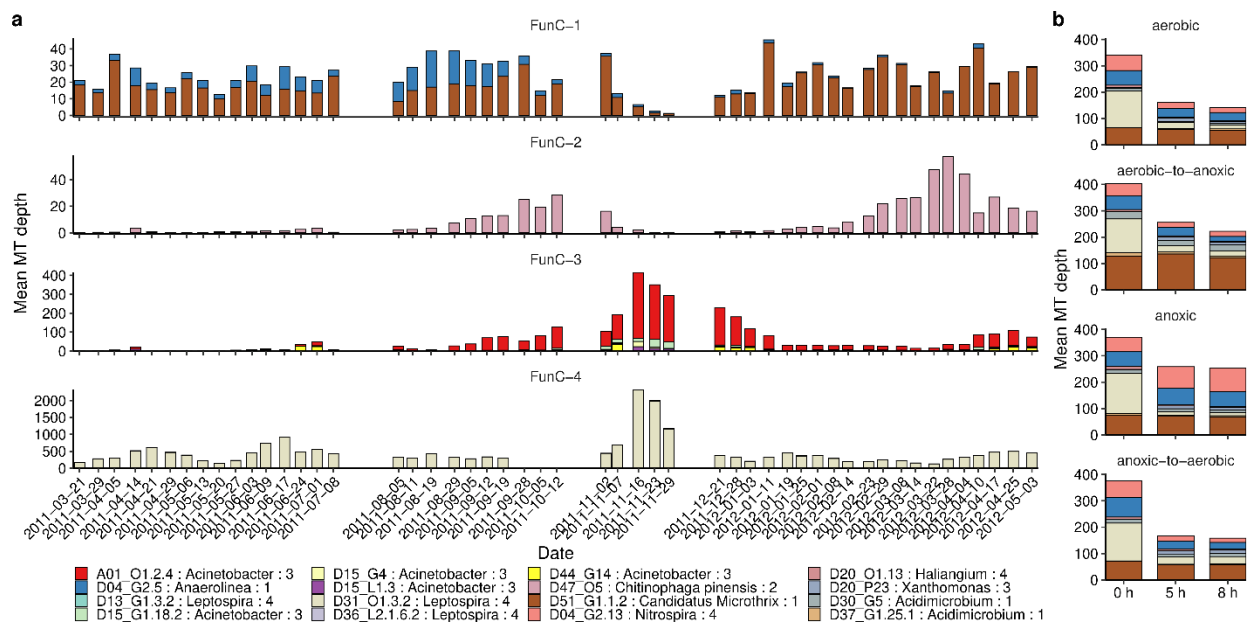

**Supplementary Figure 12:** TAG lipase gene expression levels over time. Only rMAGs with a mean MT-depth of at least 10 in any time-point for genes annotated with KO:K01046 are shown (n=16 rMAGs). In situ (a) and ex situ (b) experiments. Colors indicate rMAG assignment in the format: “rMAG ID : Genus level assignment: FunC-ID”.

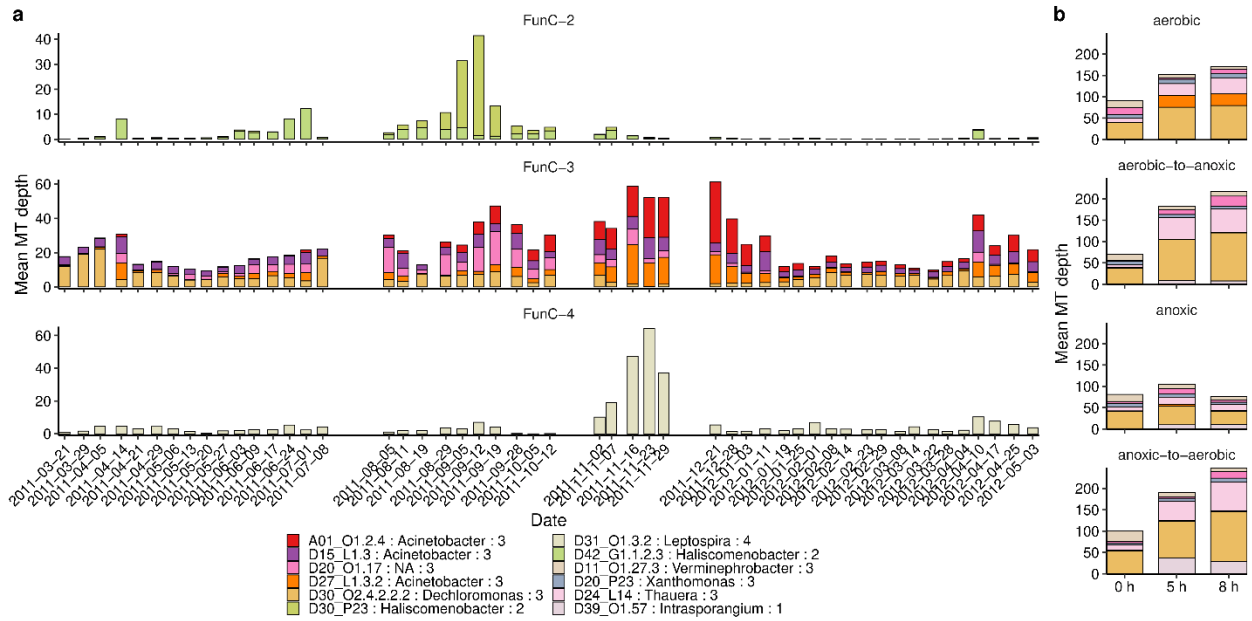

**Supplementary Figure 13:** PHA synthase gene expression levels over time. Only rMAGs with a mean MT-depth of at least 10 in any time-point for genes annotated with KO:K03821 are shown (n=12 rMAGs). In situ (a) and ex situ (b) experiments. Colors indicate rMAG assignment in the format: “rMAG ID : Genus level assignment: FunC-ID”.

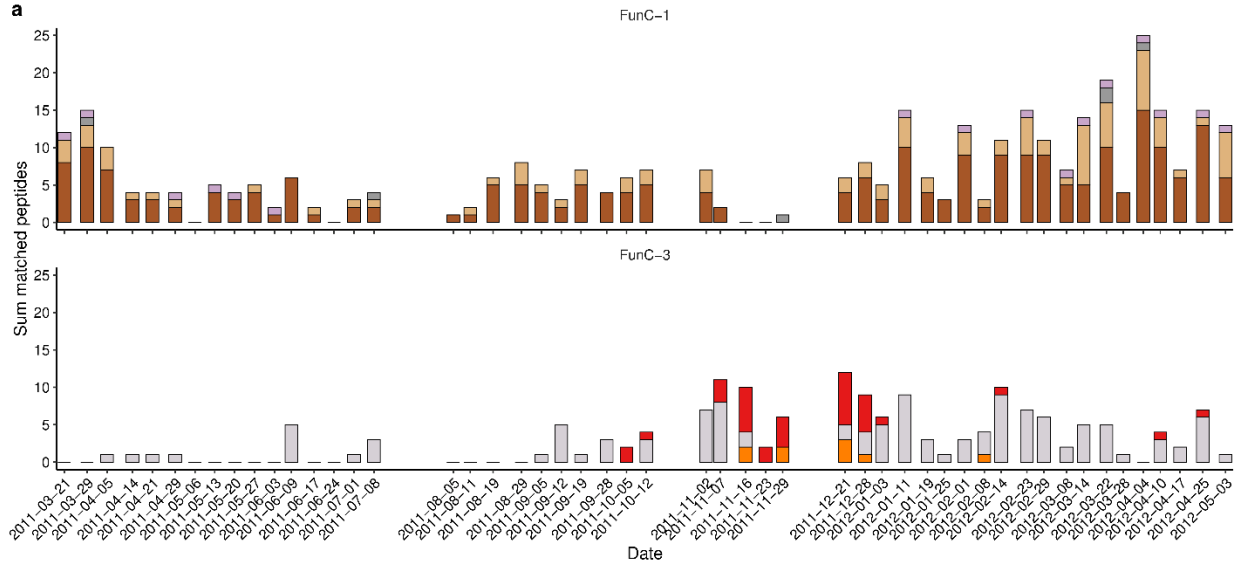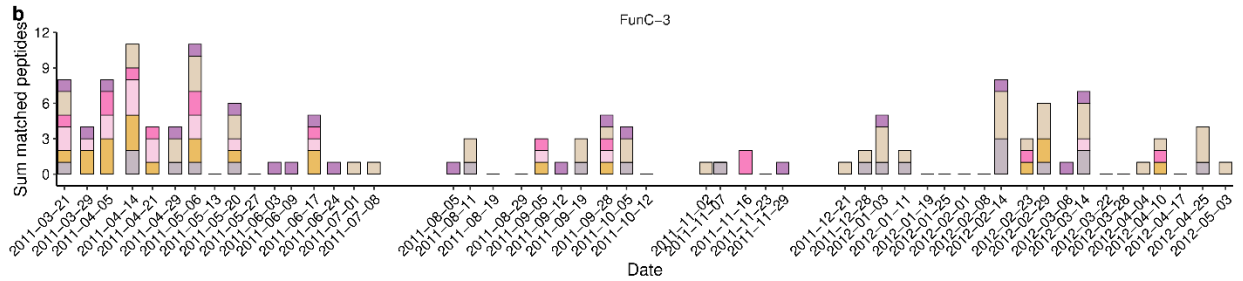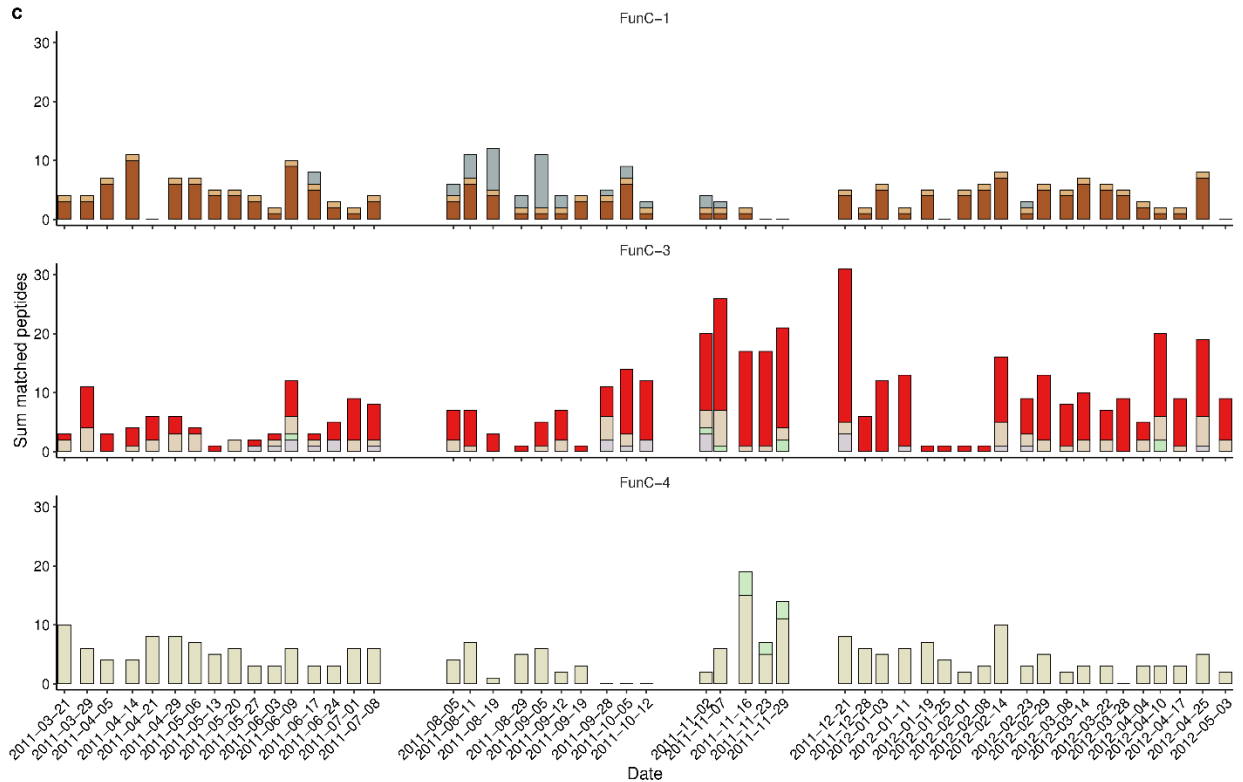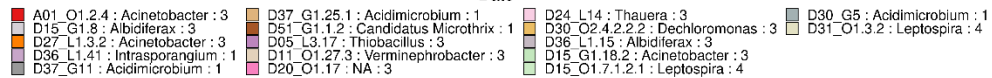



**Supplementary Figure 14:** Proteomics of WS/DGAT, PHA synthase, and TAG lipase measured in the *in situ* time-series. Spectral counts of assigned peptides to genes annotated as WS/DGAT (K00635; **a**), PHA synthase (K03821; **b**), and TAG lipase (K01046; **c**) in the respective rMAG are shown for selected rMAGs with at least 5 assigned spectral counts over all time-points (n=17 rMAGs). Colors indicate rMAG assignment and panels are separated according to FunC assignment.

## Supplementary Note 1: Expression of key functions involved in lipid metabolism over time

Using the integrated meta-omics analysis of in situ and ex situ samples, we revealed distinct, condition-specific responses of the constituent populations, notably in relation to lipid accumulation. To better understand how the individual populations' contributions to lipid metabolism change over time and to resolve key functionalities, we tracked the expression levels of individual genes central to lipid metabolism in the short-term and long-term time-series. Specifically, we focused on TAG lipases (K01046), DGAT/WS (K00635), and PHB synthase (K03821).

The expression of TAG lipases was apparent in all FunCs, but especially pronounced in FunC-3 and FunC-4 (Supplementary Fig. 12a). rMAG D31\_O1.3.2 (*Leptospira*, FunC4) showed particularly high expression of TAG lipases in November 2011. This, in combination with the encoding of functions for beta-oxidation, indicates a capability to catabolize LCFAs by this population rather than lipid accumulation. High gene expression levels were also observed at 0h for all the ex situ experiments (Supplementary Fig. 12b), but these levels decreased in the following 5h and 8h time-points after the addition of oleic acid. This was also the case for rMAG D04\_G2.5 (*Anaerolinea*, FunC1) except for the anoxic condition where lipase expression remained constant. In the in situ experiments, increased expression of lipases was apparent for D04\_G2.5 in late summer and the early autumn time-points. We observed contiguous time intervals with similarly increased MT depth for different populations, including a *Chitinophaga* rMAG with peaks in lipase expression in autumn 2011 and spring 2012 (Supplementary Fig. 12). For *Microthrix* D51\_G1.1.2 expression levels remained more stable, except for the decline in November 2011. Overall, levels were slightly elevated in winter compared to spring and summer time-points. *Microthrix* also showed a constant high expression of TAG lipases in the short-term experiments. We observed similar trends at the MP level, albeit with a higher variance (Supplementary Fig. 14c). Although, the different populations expressed TAG lipase at distinct magnitudes, intervals of peak expression seemed to be driven by niche complementarity in overall lipase activity. At a functional level, there exists competition in relation to distinct metabolic strategies for lipids, namely catabolism (performed by *Leptospira* spp., *Anaerolinea* spp., and

*Chitinophaga* spp.) and storage (performed by *Microthrix* spp.). To favour lipid storage, niches should therefore be established which favour lipid accumulation.

Characteristically, *Microthrix* D51\_G1.1.2 encoded several DGAT copies highlighting its importance for TAG accumulation<sup>1</sup>. DGAT was expressed throughout most of the time-series (Supplementary Fig. 11) but was elevated in winter, particularly in the MP data (Supplementary Fig. 14a). In the short-term experiments, *Microthrix* showed the highest expression levels for DGAT under aerobic conditions, which was not expected based on previous findings<sup>2</sup>. We observed the opposite trend, i.e., high DGAT expression under anoxic conditions, for *Intrasporangium* (D12\_L1.3) and *Acidimicrobium* (D37\_G11) of the same FunC (Supplementary Fig. 11b). *Anaerolinea* D04\_G2.5 exhibited reduced expression levels for DGAT in winter (Supplementary Fig. 11a) as well as in the short-term incubations in the presence of oxygen (Supplementary Fig. 11b). While few *Acinetobacter* associated rMAGs were covered at relevant MT or MG depth in the short-term experiments, rMAG D44\_G14 appeared to upregulate DGAT/WS at 8h in all but the anoxic condition (Supplementary Fig. 11b). This points towards a swift response to elevated LCFA levels for this population, evidenced by individual spikes in gene expression observed in the long-term time-series for this rMAG. DGAT/WS expression was also pronounced in other *Acinetobacter* rMAGs with a gradual increase in MT depth towards late autumn 2011 in A01\_O1.2.4 (Supplementary Fig. 11a). The resolved expression levels point towards an increased role for lipid accumulation in these populations in late autumn. However, an increased accumulation of wax-esters also appears plausible based on earlier characterisations of *Acinetobacter*<sup>3</sup>.

*Acinetobacter*-associated rMAGs accumulated PHA, as evidenced by the expression levels of PHB synthase (Supplementary Fig. 13). While the enzyme was not detected at the MP level (Supplementary Fig. 14), a signal was detected at the MT level for distinct rMAGs, mainly in late November. Other rMAGs of FunC3 such as *Dechloromonas* D30\_O2.4.2.2.2 exhibited PHB synthase expression consistently throughout the time-series except for late November (Supplementary Fig. 13). Interestingly, this population as well as *Thaurea* showed increasing PHB synthase MT depth for the aerobic conditions in the short-term experiments, while an *Acinetobacter* population could also be detected at higher MT depth only in the aerobic experiment.

## Supplementary References

1. Sheik, A. R., Muller, E. E. L. & Wilmes, P. A hundred years of activated sludge: time for a rethink. *Front. Microbiol.* **5**, 1–7 (2014).
2. May, R. M. & Arthur, R. H. M. Niche overlap as a function of environmental variability. *Proc. Natl. Acad. Sci.* **69**, 1109–1113 (1972).
3. Alvarez, H. M. Triacylglycerol and wax ester-accumulating machinery in prokaryotes. *Biochimie* **120**, 28–39 (2016).
